# Supplementary material for: Pho dynamically interacts with Spt5 to facilitate transcriptional switches at the hsp70 locus
Source: Epigenetics Chromatin. 2017 Dec 6;10:57. doi: 10.1186/s13072-017-0166-9 (PMC5718073; doi:10.1186/s13072-017-0166-9)
Supplement: Supplementary file 7 — Additional file 7: Table S1. List of the primer sequences used in the study. [file 13072_2017_166_MOESM7_ESM.xlsx]

## Sheet: Sheet1
Additional File 7: Primer sequences used in the study
Primer name (position w.r.t to TSS)	Forward sequence	Reverse sequence	Purpose
Act42A_promoter (+104 bp)	ggcaggagtcttaccttttatgg	gcgtcggtcaattcaatctt	ChIP-qPCR
Act42A_gene body (+882 bp)	atcgctcatttccgatggt	ttggacttcgagcaggagat	ChIP-qPCR
hsp70_HSF binding site (-85 bp)	ctcgaaccaacgagagcagt	aggtcatttgtttggcagaaa	ChIP-qPCR
hsp70_promoter proximal region (+78 bp)	ttgcactttattgcagattgttt	taaacggcgcactgttctc	ChIP-qPCR
hsp70_gene body (+802 bp)	gctcacccttgaggttcttg	ctgaccaagatgaaggagacg	ChIP-qPCR
hsp70_RT1 (+687 bp)	tgggagtcgttgaagtaggc	gaggagatcagctcgatggt	RT-qPCR
hsp70_RT2 (+1492 bp)	ccgagtacgtggagaacgtc	ccccactttcattgggaat	RT-qPCR
18S	ctgagaaacggctaccacatc	accagacttgccctccaat	RT-qPCR
Pho	caccatggcatacgaacgttttg	tcagtctgcatataccacaaac	TOPO cloning
Spt4	caccatggcctttgacgcgatac	ttatcgttgacttctgtcc	TOPO cloning
Spt5	caccatgtcggactcggaagtca	ttagtcgatggacttcatctt	TOPO cloning
dSfmbt	caccatgaacccatccgagctgc	ctataaaaacggtgattt	TOPO cloning
Pho V164D	catccgggatatcagacgat	cccacattgtgtcactaaactct	TOPO cloning
Pho ΔREPO	gggatatcagacgatgaatac	ccgtcttgacttgccgtttg	TOPO cloning
N-Pho	caccatggcatacgaacgttttg	ataagatactgtaacttcgg	TOPO cloning
N-Pho 1-200	caccatggcatacgaacgttttg	gaagccatcaatgccaaatt	TOPO cloning
N-Pho 173-351	caccgacgatgaatactctggttc	ataagatactgtaacttcgg	TOPO cloning
C-Pho	caccacaaatgataaaaaaatagc	tcagtctgcatataccacaaac	TOPO cloning
HSF RNAi	gaattaatacgactcactatagggagagccttccaggagaatgca	gaattaatacgactcactatagggagagctcgtggataaccggtc	RNAi
LacZ RNAi	gaattaatacgactcactatagggagagatatcctgctgatgaagc	gaattaatacgactcactatagggagagcaggagctcgttatcgc	RNAi
